# Supplementary material for: Transcriptome analysis of Xenopus orofacial tissues deficient in retinoic acid receptor function
Source: PubMed Central journal article supplement (PMC6215681; doi:10.1186/s12864-018-5186-8), 2018-11-03
Supplement: 12864_2018_5186_MOESM3_ESM.pdf [file 12864_2018_5186_MOESM3_ESM.pdf]

**Table S1. Human disorders with a median craniofacial component and associated genes.**

Disorders that were identified by a keyword search in OMIM.org for six keywords listed in Figure 7. The associated gene(s) are listed with their corresponding OMIM number. Multiple genes were identified for some disorders.

| <b>Disorders Associated with OMIM Keyword Search for Craniofacial Defects</b> |                                                                                                   |                        |                         |
|-------------------------------------------------------------------------------|---------------------------------------------------------------------------------------------------|------------------------|-------------------------|
| <b>Disease OMIM Number</b>                                                    | <b>Disease Name</b>                                                                               | <b>Associated Gene</b> | <b>Gene OMIM Number</b> |
| 100300                                                                        | ADAMS-OLIVER SYNDROME 1                                                                           | <i>ARHGAP31</i>        | 610911                  |
| 100800                                                                        | ACHONDROPLASIA                                                                                    | <i>FGFR3</i>           | 134934                  |
| 101400                                                                        | SAETHRE-CHOTZEN SYNDROME                                                                          | <i>TWIST1</i>          | 601622                  |
| 101600                                                                        | PFEIFFER SYNDROME                                                                                 | <i>FGFR1</i>           | 136350                  |
|                                                                               |                                                                                                   | <i>FGFR2</i>           | 176943                  |
| 105650                                                                        | DIAMOND-BLACKFAN ANEMIA 1                                                                         | <i>RPS19</i>           | 603474                  |
| 106260                                                                        | ANKYLOBLEPHARON-ECTODERMAL DEFECTS-CLEFT LIP/PALATE                                               | <i>TP63</i>            | 603273                  |
| 106600                                                                        | TOOTH AGENESIS, SELECTIVE, 1                                                                      | <i>MSX1</i>            | 142983                  |
| 108300                                                                        | STICKLER SYNDROME, TYPE 1                                                                         | <i>COL2A1</i>          | 120140                  |
| 108720                                                                        | ATELOSTEOGENESIS, TYPE 1                                                                          | <i>FLNB</i>            | 603381                  |
| 109400                                                                        | BASAL CELL NEVUS SYNDROME                                                                         | <i>PTCH1</i>           | 601309                  |
|                                                                               |                                                                                                   | <i>PTCH2</i>           | 603673                  |
|                                                                               |                                                                                                   | <i>SUFU</i>            | 607035                  |
| 113620                                                                        | BRANCHIOOCULOFACIAL SYNDROME                                                                      | <i>TFAP2A</i>          | 107580                  |
| 114290                                                                        | CAMPOMELIC DYSPLASIA                                                                              | <i>SOX9</i>            | 608160                  |
| 114300                                                                        | ARTHROGRYPOSIS, DISTAL, TYPE 3                                                                    | <i>PIEZO2</i>          | 613629                  |
| 117000                                                                        | CENTRAL CORE DISEASE OF MUSCLE                                                                    | <i>RYR1</i>            | 180901                  |
| 117650                                                                        | CEREBROSTOMANDIBULAR SYNDROME                                                                     | <i>SNRPB</i>           | 182282                  |
| 119300                                                                        | VAN DER WOUDE SYNDROME 1                                                                          | <i>IRF6</i>            | 607199                  |
| 119500                                                                        | POPLITEAL PTERYGIUM SYNDROME                                                                      | <i>IRF6</i>            | 607199                  |
| 119540                                                                        | CLEFT PALATE, ISOLATED                                                                            | <i>UBB</i>             | 191339                  |
| 119600                                                                        | CLEIDOCRANIAL DYSPLASIA                                                                           | <i>RUNX2</i>           | 600211                  |
| 120433                                                                        | COLOBOMA, OCULAR, WITH OR WITHOUT HEARING IMPAIRMENT, CLEFT LIP/PALATE, AND/OR MENTAL RETARDATION | <i>YAP1</i>            | 606608                  |
| 122470                                                                        | CORNELIA DE LANGE SYNDROME 1                                                                      | <i>NIPBL</i>           | 608667                  |
| 123150                                                                        | JACKSON-WEISS SYNDROME                                                                            | <i>FGFR1</i>           | 136350                  |
|                                                                               |                                                                                                   | <i>FGFR2</i>           | 176943                  |
| 123500                                                                        | CROUZAN SYNDROME                                                                                  | <i>FGFR2</i>           | 176943                  |
| 124500                                                                        | VOHWINKEL SYNDROME                                                                                | <i>GJB2</i>            | 121011                  |
| 129400                                                                        | RAPP-HODGKIN SYNDROME                                                                             | <i>TP63</i>            | 603273                  |
| 130070                                                                        | EHLERS-DANLOS SYNDROME WITH SHORT STATURE AND LIMB ANOMALIES                                      | <i>B4GALT7</i>         | 604327                  |
| 130650                                                                        | BECKWITH-WIEDEMANN SYNDROME                                                                       | <i>CDKN1C</i>          | 600856                  |
|                                                                               |                                                                                                   | <i>ICR1</i>            | 616186                  |
|                                                                               |                                                                                                   | <i>H19</i>             | 103280                  |

|        |                                                                                    |                 |        |
|--------|------------------------------------------------------------------------------------|-----------------|--------|
|        |                                                                                    | <i>KCNQ10T1</i> | 604115 |
| 135900 | COFFIN-SIRIS SYNDROME 1                                                            | <i>ARID1B</i>   | 614556 |
| 136760 | FRONTONASAL DYSPLASIA 1                                                            | <i>ALX3</i>     | 606014 |
|        |                                                                                    | <i>KIF3A</i>    | 604683 |
| 137215 | GASTRIC CANCER, FAMILIAL DIFFUSE, WITH OR WITHOUT CLEFT LIP AND/OR PALATE          | <i>CDH1</i>     | 192090 |
| 139210 | MYHRE SYNDROME                                                                     | <i>SMAD4</i>    | 600993 |
| 142945 | HOLOPROSENCEPHALY 3                                                                | <i>SHH</i>      | 600725 |
| 142946 | HOLOPROSENCEPHALY 4                                                                | <i>TGIF1</i>    | 602630 |
| 145410 | OPITZ GBBB SYNDROME, TYPE 2                                                        | <i>SPECC1L</i>  | 614140 |
| 146110 | HYPOGONADOTROPIC HYPOGONADISM 7 WITH OR WITHOUT ANOSMIA                            | <i>GNRHR</i>    | 138850 |
| 146255 | HYPOPARATHYROIDISM, SENSORINEURAL DEAFNESS, AND RENAL DISEASE                      | <i>GATA3</i>    | 131320 |
| 146510 | PALLISTER-HALL SYNDROME                                                            | <i>GLI3</i>     | 165240 |
| 147920 | KABUKI SYNDROME 1                                                                  | <i>KMT2D</i>    | 602113 |
| 148820 | WAARDENBURG SYNDROME, TYPE 3                                                       | <i>PAX3</i>     | 606597 |
| 150250 | LARSEN SYNDROME                                                                    | <i>FLNB</i>     | 603381 |
| 151050 | LENZ-MAJEWSKI HYPEROSTOTIC DWARFISM                                                | <i>PTDSS1</i>   | 612792 |
| 153400 | LYMPHEDEMA-DISTICHIASIS SYNDROME WITH RENAL DISEASE AND DIABETES MELLITUS INCLUDED | <i>FOXC2</i>    | 602402 |
| 154400 | ACROFACIAL DYSTOSIS 1, NAGER TYPE                                                  | <i>SF3B4</i>    | 605593 |
| 154500 | TREACHER COLLINS SYNDROME                                                          | <i>TCOF1</i>    | 606847 |
| 154780 | MARSHALL SYNDROME                                                                  | <i>COL11A1</i>  | 120280 |
| 156400 | METAPHYSEAL CHONDRODYSPLASIA, JANSEN TYPE                                          | <i>PTHR1</i>    | 168468 |
| 156550 | KNIEST DYSPLASIA                                                                   | <i>COL2A1</i>   | 120140 |
| 156610 | SKIN CREASES, CONGENITAL SYMMETRIC CIRCUMFERENTIAL 1                               | <i>TUBB</i>     | 191130 |
| 157170 | HOLOPROSENCEPHALY 2                                                                | <i>SIX3</i>     | 603714 |
| 161200 | NAIL-PATELLA SYNDROME                                                              | <i>LMX1B</i>    | 602575 |
| 162100 | AMYOTROPHY, HEREDITARY NEURALGIC                                                   | <i>SEPT9</i>    | 604061 |
| 163200 | SCHIMMELPENNING-FEUERSTEIN-MIMS SYNDROME                                           | <i>NRAS</i>     | 164790 |
|        |                                                                                    | <i>HRAS</i>     | 190020 |
|        |                                                                                    | <i>KRAS</i>     | 190070 |
| 164200 | OCULODENTODIGITAL DYSPLASIA                                                        | <i>GJA1</i>     | 121014 |
| 168500 | PARIETAL FORAMINA 1                                                                | <i>MSX2</i>     | 123101 |
| 170390 | ANDERSEN CARDIODYSRHYTHMIC PERIODIC PARALYSIS                                      | <i>KCNJ2</i>    | 600681 |
| 174300 | OROFACIODIGITAL SYNDROME 5                                                         | <i>DDX59</i>    | 615464 |
| 180200 | RETINOBLASTOMA                                                                     | <i>RB1</i>      | 614041 |
| 182212 | SHPRINTZEN-GOLDBERG CRANIOSYNOSTOSIS SYNDROME                                      | <i>SKI</i>      | 164780 |
| 182290 | SMITH-MAGENIS SYNDROME                                                             | <i>RAI</i>      | 607642 |
| 183900 | SPONDYLOEPIPHYSEAL DYSPLASIA CONGENITA                                             | <i>COL2A1</i>   | 120140 |
| 184250 | SPONDYLOEPIPHYSEAL DYSPLASIA STRUDWICK TYPE                                        | <i>COL2A1</i>   | 120140 |
| 184840 | OTOSPONDYLOMEGAEPIPHYSEAL DYSPLASIA, AUTOSOMAL DOMINANT                            | <i>COL11A2</i>  | 120290 |
| 188400 | DIGEORGE SYNDROME                                                                  | <i>TBX1</i>     | 602054 |
| 192430 | VELOCARDIOFACIAL SYNDROME                                                          | <i>TBX1</i>     | 602054 |
| 193230 | VITREORETINAL DEGENERATION, SNOWFLAKE TYPE                                         | <i>KCN13</i>    | 602308 |
| 193500 | WAARDENBURG SYNDROME, TYPE 1                                                       | <i>PAX3</i>     | 606597 |

|                  |                                                                                                  |                 |        |
|------------------|--------------------------------------------------------------------------------------------------|-----------------|--------|
| 193700           | ARTHROGRYPOSIS, DISTAL, TYPE 2A                                                                  | <i>MYH3</i>     | 160720 |
| 194080           | DENYS-DRASH SYNDROME                                                                             | <i>WT1</i>      | 607102 |
| 202650           | AGNATHIA-OTOCEPHALY COMPLEX                                                                      | <i>PRRX1</i>    | 167420 |
| 206900           | MICROPHTHALMIA, SYNDROMIC 3                                                                      | <i>SOX2</i>     | 184429 |
| 206920           | MICROPHTHALMIA WITH LIMB ANOMALIES                                                               | <i>SMOC1</i>    | 608488 |
| 208150           | FETAL AKINESIA DEFORMATION SEQUENCE                                                              | <i>RAPSN</i>    | 601592 |
|                  |                                                                                                  | <i>DOK7</i>     | 610285 |
|                  |                                                                                                  | <i>MUSK</i>     | 601296 |
| 209885           | BARBER-SAY SYNDROME                                                                              | <i>TWIST2</i>   | 607556 |
| 211750           | C SYNDROME                                                                                       | <i>CD96</i>     | 606037 |
| 212780           | CENANI-LENZ SYNDACTYLY SYNDROME                                                                  | <i>LRP4</i>     | 604270 |
| 213980           | CRANIOFACIAL DYSMORPHISM, SKELETAL ANOMALIES, AND MENTAL RETARDATION SYNDROME                    | <i>TMCO1</i>    | 614123 |
| 214300           | KLIPPEL-FEIL SYNDROME 2, AUTOSOMAL RECESSIVE                                                     | <i>MEOX1</i>    | 600147 |
| 214800           | CHARGE SYNDROME                                                                                  | <i>SEMA3E</i>   | 608166 |
|                  |                                                                                                  | <i>CHD7</i>     | 608892 |
| 215045           | CHONDRODYSPLASIA, BLOMSTRAND TYPE                                                                | <i>PTH1R</i>    | 168468 |
| 215150           | OTOSPONDYLOMEGAEPIPHYSEAL DYSPLASIA, AUTOSOMAL RECESSIVE                                         | <i>COL11A2</i>  | 120290 |
| 216360           | COACH SYNDROME                                                                                   | <i>TMEM67</i>   | 609884 |
|                  |                                                                                                  | <i>CC2D2A</i>   | 612013 |
|                  |                                                                                                  | <i>RPGRIP1L</i> | 610937 |
| 217095           | CONOTRUNCAL ANOMALY FACE SYNDROME                                                                | <i>TBX1</i>     | 602054 |
| 219000           | FRASER SYNDROME 1                                                                                | <i>FRAS1</i>    | 607830 |
| 220111           | LEIGH SYNDROME, FRENCH CANADIAN TYPE                                                             | <i>LRPPRC</i>   | 607544 |
| 220210           | RITSCHER-SCHINZEL SYNDROME                                                                       | <i>WSHC5</i>    | 610657 |
| 222600           | DIASTROPHIC DYSPLASIA, BROAD BONE-PLATYSPODYLIC VARIANT INCLUDED                                 | <i>SLC26A2</i>  | 606718 |
| 225060           | CLEFT LIP/PALATE-ECTODERMAL DYSPLASIA SYNDROME                                                   | <i>NECTIN1</i>  | 600644 |
| 225300           | SPLIT-HAND/FOOT MALFORMATION 6                                                                   | <i>WNT10B</i>   | 601906 |
| 225500           | ELLIS-VAN CREVELD SYNDROME                                                                       | <i>EVC</i>      | 604831 |
| 225300           | SPLIT-HAND/FOOT MALFORMATION 6                                                                   | <i>EVC2</i>     | 607261 |
| 225790<br>227170 | PROLIERATIVE VASCULOPATHY AND HYDRANENCEPHALY-HYDROCEPHALY SYNDROME OROFACIAL DIGITAL SYNDROME 6 | <i>FLVCR2</i>   | 610865 |
|                  |                                                                                                  | <i>C5ORF42</i>  | 614571 |
| 228930           | FIBULAR APLASIA OR HYPOPLASIA, FEMORAL BOWING AND POLY-, SYN-, OLIGODACTYLY                      | <i>WNT7A</i>    | 601570 |
| 230740           | GAPO SYNDROME                                                                                    | <i>ANTXR1</i>   | 606410 |
| 235730           | MOWAT-WILSON SYNDROME                                                                            | <i>ZEB2</i>     | 605802 |
| 236100           | HOLOPROSENCEPHALY 1                                                                              | <i>GAS1</i>     | 139185 |
| 236250           | HOMOCYSTINURIA DUE TO DEFICIENCY OF N(5,10)-METHYLENETERAHYDROFOLATE REDUCTASE ACTIVITY          | <i>MTHFR</i>    | 607093 |
| 236670           | MUSCULAR DYSTROPHY-DYSTROGLYCANOPATHY (CONGENITAL WITH BRAIN AND EYE ANOMALIES), TYPE A1         | <i>POMT1</i>    | 607423 |
| 236680           | HYDROLETHALUS SYNDROME 1                                                                         | <i>HYLS1</i>    | 610693 |
| 239300           | HYPERPHOSPHATASIA WITH MENTAL RETARDATION SYNDROME 1                                             | <i>PIGV</i>     | 610274 |
| 241800           | HYPOTHALAMIC HAMARTOMAS                                                                          | <i>GLI3</i>     | 165240 |
| 241850           | HYPOTHYROIDISM, THYROIDAL OR ATHYROIDAL, WITH SPIKY                                              | <i>FOXE1</i>    | 602617 |

|        |                                                                                                                   |                |        |
|--------|-------------------------------------------------------------------------------------------------------------------|----------------|--------|
|        | HAIR AND CLEFT PALATE                                                                                             |                |        |
| 242840 | VICI SYNDROME                                                                                                     | <i>EPG5</i>    | 615086 |
| 243310 | BARAITSER-WINTER SYNDROME 1                                                                                       | <i>ACTB</i>    | 102630 |
| 243605 | STROMME SYNDROME                                                                                                  | <i>CENPF</i>   | 600236 |
| 244200 | HYPOGONADOTROPIC HYPOGONADISM 3 WITH OR WITHOUT ANOSMIA                                                           | <i>PROKR2</i>  | 607123 |
| 245150 | KEUTEL SYNDROME                                                                                                   | <i>MGP</i>     | 154870 |
| 245600 | MULTIPLE JOINT DISLOCATIONS, SHORT STATURE, AND CRANIOFACIAL DYSMORPHISM WITH OR WITHOUT CONGENITAL HEART DEFECTS | <i>B3GAT3</i>  | 606374 |
| 248390 | TREACHER COLLINS SYNDROME 3                                                                                       | <i>POLR1C</i>  | 610060 |
| 248500 | MANNISOIDOSIS, ALPHA B, LYSOSOMAL                                                                                 | <i>MAN2B1</i>  | 609458 |
| 248700 | MARDEN-WALKER SYNDROME                                                                                            | <i>PIEZO2</i>  | 613629 |
| 249000 | MECKEL SYNDROME                                                                                                   | <i>MKS1</i>    | 609883 |
| 253250 | MULIBREY NANISM                                                                                                   | <i>TRIM37</i>  | 605073 |
| 255320 | MINICORE MYOPATHY WITH EXTERNAL OPHTHALMOPLEGIA                                                                   | <i>RYR1</i>    | 180901 |
| 255995 | NATIVE AMERICAN MYOPATHY                                                                                          | <i>STAC3</i>   | 615521 |
| 256030 | NEMALINE MYOPATHY 2                                                                                               | <i>NEB</i>     | 161650 |
| 256050 | ATELOSTEOGENESIS, TYPE 2                                                                                          | <i>SLC26A2</i> | 606718 |
| 256520 | NEU-LAXOVA SYNDROME 1                                                                                             | <i>PHGDH</i>   | 606879 |
| 257300 | MOSAIC VARIEGATED ANEUPLOIDY SYNDROME 1                                                                           | <i>BUB1B</i>   | 602860 |
| 257920 | 3MC SYNDROME 1                                                                                                    | <i>MASP1</i>   | 600521 |
| 258860 | OROFACIAL DIGITAL SYNDROM 4                                                                                       | <i>TCTN3</i>   | 613847 |
| 259100 | HYPERTROPHIC OSTEOARTHROPATHY, PRIMARY, AUTOSOMAL RECESSIVE 1                                                     | <i>HPGD</i>    | 601688 |
| 259775 | RAINE SYNDROME                                                                                                    | <i>FAM20C</i>  | 611061 |
| 260660 | COUSIN SYNDROME                                                                                                   | <i>TBX15</i>   | 604127 |
| 261540 | PETERS-PLUS SYNDROME                                                                                              | <i>B3GLCT</i>  | 610308 |
| 262500 | LARON SYNDROME                                                                                                    | <i>GHR</i>     | 600946 |
| 263520 | SHORT-RIB THORACIC DSYPLASIA 6 WITH OR WITHOUT POLYDACTYLY                                                        | <i>NEK1</i>    | 604588 |
| 263650 | POPLITEAL PTERYGIUM SYNDROME, LETHAL TYPE                                                                         | <i>RIPK4</i>   | 605706 |
| 263750 | POSTAXIAL ACROFACIAL DYSOSTOSIS                                                                                   | <i>DHODH</i>   | 126064 |
| 265000 | MULTIPLE PTERYGIUM SYNDROME, ESCOBAR VARIANT                                                                      | <i>CHRNA3</i>  | 100730 |
| 265050 | 3MC SYNDROME 2                                                                                                    | <i>COLEC11</i> | 612502 |
| 266280 | RAPADILINO SYNDROME                                                                                               | <i>RECQL4</i>  | 603780 |
| 266920 | SHORT-RIB THORACIC DYSPLASIA 9 WITH OR WITHOUT POLYDACTYLY                                                        | <i>IFT140</i>  | 614620 |
| 267000 | PERLMAN SYNDROME                                                                                                  | <i>DIS3L2</i>  | 614184 |
| 268300 | ROBERTS SYNDROME                                                                                                  | <i>ESCO2</i>   | 609353 |
| 268310 | ROBINOW SYNDROME, AUTOSOMAL RECESSIVE                                                                             | <i>ROR2</i>    | 602337 |
| 268305 | ROBIN SEQUENCE WITH CLEFT MANDIBLE AND LIMB ANOMALIES                                                             | <i>EIF4A3</i>  | 608546 |
| 268400 | ROTHMUND-THOMSON SYNDROME                                                                                         | <i>RECQL4</i>  | 603780 |
| 269000 | SC PHOCOMELIA SYNDROME                                                                                            | <i>ESCO2</i>   | 609353 |
| 270400 | SMITH-LEMLI-OPTIZ SYNDROME                                                                                        | <i>DCHR7</i>   | 602858 |
| 270420 | DIARRHEA 3, SECRETORY SODIUM, CONGENITAL, WITH OR WITHOUT OTHER CONGENITAL ANOMALIES                              | <i>SPINT2</i>  | 605124 |

|        |                                                                                                              |                |        |
|--------|--------------------------------------------------------------------------------------------------------------|----------------|--------|
| 271640 | SPONDYLOEPIMETAPHYSEAL DYSPLASIA WITH JOINT LAXITY, TYPE 1, WITH OR WITHOUT FRACTURES                        | <i>B3GALT6</i> | 615291 |
| 272430 | COLD-INDUCED SWEATING SYNDROME                                                                               | <i>CRLF1</i>   | 604237 |
| 272440 | FILIPPI SYNDROME                                                                                             | <i>CKAP2L</i>  | 616174 |
| 272460 | SPONDYLCARPOTARSAL SYNOSTOSIS SYNDROME                                                                       | <i>FLNB</i>    | 603381 |
| 273395 | TETRAAMELIA SYNDROME, AUTOSOMAL RECESSIVE; TETAMS                                                            | <i>WNT3</i>    | 165330 |
| 276820 | ULNA AND FIBULA, ABSENCE OF, WITH SEVERE LIMB DEFICIENCY                                                     | <i>WNT7A</i>   | 601570 |
| 276950 | VACTERL ASSOCIATION WITH HYDROCEPHALUS                                                                       | <i>PTEN</i>    | 601728 |
| 277450 | VITAMIN K-DEPENDENT CLOTTING FACTORS, COMBINED DEFICIENCY OF, 1                                              | <i>GGCX</i>    | 137167 |
| 280000 | COLOBOMA, CONGENITAL HEART DISEASE, ICHTHYOSIFORM DERMATOSIS, MENTAL RETARDATION, AND EAR ANOMALIES SYNDROME | <i>PIGL</i>    | 605947 |
| 300000 | OPITZ GBBB SYNDROME, TYPE I                                                                                  | <i>MID1</i>    | 300552 |
| 300004 | CORPUS CALLOSUM, AGENESIS OF, WITH ABNORMAL GENITALIA                                                        | <i>ARX</i>     | 300382 |
| 300166 | MICROPTHALMIA, SYNDROMIC 2                                                                                   | <i>BCOR</i>    | 300485 |
| 300209 | SIMPSON-GOLABI-BEHMEL SYNDROME, TYPE 2                                                                       | <i>OFD1</i>    | 300170 |
| 300215 | LISSENCEPHALY, X-LINKED, 2                                                                                   | <i>ARX</i>     | 300382 |
| 300244 | TERMINAL OSSEOUS DYSPLASIA                                                                                   | <i>FLNA</i>    | 300017 |
| 300263 | SIDERIUS X-LINKED MENTAL RETARDATION SYNDROME                                                                | <i>PHF8</i>    | 300560 |
| 300321 | FG SYNDROME 2                                                                                                | <i>FLNA</i>    | 300017 |
| 300373 | OSTEOPATHIA STRIATA WITH CRANIAL SCLEROSIS                                                                   | <i>AMER1</i>   | 300647 |
| 300590 | CORNELIA DE LANGE SYNDROME 2                                                                                 | <i>SMC1A</i>   | 300040 |
| 300749 | MENTAL RETARDATION AND MICROCEPHALY WITH PONTINE AND CEREBELLAR HYPOPLASIA                                   | <i>CASK</i>    | 300172 |
| 300804 | JOUBERT SYNDROME 10                                                                                          | <i>OFD1</i>    | 300170 |
| 300867 | KABUKI SYNDROME 2                                                                                            | <i>KMD6A</i>   | 300128 |
| 300868 | MULTIPLE CONGENITAL ANOMALIES-HYPOTONIA-SEIZURES SYNDROME 2                                                  | <i>PIGA</i>    | 311770 |
| 300882 | CORNELIA DE LANGE SYNDROME 5                                                                                 | <i>HDAC8</i>   | 300269 |
| 300946 | DIAMOND-BLACKFAN ANEMIA 14 WITH MANDIBULOFACIAL DYSOSTOSIS                                                   | <i>TSR2</i>    | 300945 |
| 300958 | MENTAL RETARDATION, X-LINKED 102                                                                             | <i>DDDX3X</i>  | 300160 |
| 300960 | MEND SYNDROME                                                                                                | <i>EBP</i>     | 300205 |
| 302905 | ABRUZZO-ERICKSON SYNDROME                                                                                    | <i>TBX22</i>   | 300307 |
| 303400 | CLEFT PALATE WITH OR WITHOUT ANKYLOGLOSSIA, X-LINKED                                                         | <i>TBX22</i>   | 300307 |
| 304110 | CRANIOFRONTONASAL SYNDROME                                                                                   | <i>EFNB1</i>   | 300035 |
| 304120 | OTOPALATODIGITAL SYNDROME, TYPE II                                                                           | <i>FLNA</i>    | 300017 |
| 305600 | FOCAL DERMAL HYPOPLASIA                                                                                      | <i>PORCN</i>   | 300651 |
| 305620 | FRONTOMETAPHYSEAL DYSPLASIA 1                                                                                | <i>FLNA</i>    | 300017 |
| 307000 | HYDROCEPHALUS DUE TO CONGENITAL STENOSIS OF AQUEDUCT OF SYLVIUS                                              | <i>L1CAM</i>   | 308840 |
| 308205 | IFAP SYNDROME WITH OR WITHOUT BRESHECK SYNDROME                                                              | <i>MBTPS2</i>  | 300294 |
| 308700 | HYPOGONADOTROPIC HYPOGONADISM 1 WITH OR WITHOUT ANOSMIA                                                      | <i>ANOS1</i>   | 300836 |
| 309350 | MELNICK-NEEDLES SYNDROME                                                                                     | <i>FLNA</i>    | 300017 |
| 309500 | RENPENNING SYNDROME 1                                                                                        | <i>PQBP1</i>   | 300463 |

|        |                                                                     |                |        |
|--------|---------------------------------------------------------------------|----------------|--------|
| 309520 | LUJAN-FRYNS SYNDROME                                                | <i>MED12</i>   | 300188 |
| 309580 | MENTAL RETARDATION-HYPOTONIC FACIES SYNDROME, X-LINKED, 1           | <i>ATRX</i>    | 300032 |
| 309583 | MENTAL RETARDATION, X-LINKED, SYNDROMIC, SNYDER-ROBINSON TYPE       | <i>SMS</i>     | 300105 |
| 311200 | OROFACIODIGITAL SYNDROME I; OFD1                                    | <i>OFD1</i>    | 300170 |
| 311300 | OTOPALATODIGITAL SYNDROME, TYPE I                                   | <i>FLNA</i>    | 300017 |
| 311900 | TARP SYNDROME                                                       | <i>RBM10</i>   | 300080 |
| 312870 | SIMPSON-GOLABI-BEHMEL SYNDROME, TYPE 1                              | <i>GPC3</i>    | 300037 |
| 314390 | VACTERL ASSOCIATION, X-LINKED, WITH OR WITHOUT HYDROCEPHALUS        | <i>ZIC3</i>    | 300265 |
| 400044 | 46,XY SEX REVERSAL 1                                                | <i>SRY</i>     | 480000 |
| 600251 | FACIAL CLEFTING, OBLIQUE, 1                                         | <i>SPECC1L</i> | 614140 |
| 600625 | OROFACIAL CLEFT 11                                                  | <i>BMP4</i>    | 112262 |
| 600920 | VAN DEN ENDE-GUPTA SYNDROME                                         | <i>SCARF2</i>  | 613619 |
| 601186 | MICROPTHALMIA, SYNDROMIC 9                                          | <i>STRA6</i>   | 610745 |
| 601492 | MUCOPOLYSACCHARIDOSIS, TYPE 9                                       | <i>HYAL1</i>   | 607071 |
| 601680 | ARTHROGRYPOSIS, DISTAL                                              | <i>MYH3</i>    | 160720 |
|        |                                                                     | <i>TPM2</i>    | 190990 |
|        |                                                                     | <i>TNNI2</i>   | 191043 |
|        |                                                                     | <i>TNNT3</i>   | 600692 |
| 601776 | EHLERS-DANLOS SYNDROME, MUSCULOCONTRACTURAL TYPE 1                  | <i>CHST14</i>  | 608429 |
| 602081 | SPEECH-LANGUAGE DISORDER 1                                          | <i>FOXP2</i>   | 605317 |
| 602361 | GRACILE BONE DYSPLASIA                                              | <i>FAM111A</i> | 615292 |
| 602483 | AURICULOCONDYLAR SYNDROME 1                                         | <i>GNAI3</i>   | 139370 |
| 602849 | MUENKE SYNDROME                                                     | <i>FGFR3</i>   | 134934 |
| 603194 | MECKEL SYNDROME, TYPE 2                                             | <i>TMEM216</i> | 613277 |
| 603543 | LIMB-MAMMARY SYNDROME                                               | <i>TP63</i>    | 603273 |
| 603546 | SPONDYLOEPIMETAPHYSEAL DYSPLASIA WITH JOINT LAXITY, TYPE 2          | <i>KIF22</i>   | 603213 |
| 603671 | ACROMELIC FRONTO NASAL DYSOSTOSIS                                   | <i>ZSWIM6</i>  | 615951 |
| 604232 | LEBER CONGENITAL AMAUROSIS 3                                        | <i>SPATA7</i>  | 609868 |
| 604292 | ECTRODACTYLY, ECTODERMAL DYSPLASIA, AND CLEFT LIP/PALATE SYNDROME 3 | <i>TP63</i>    | 603273 |
| 604841 | STICKLER SYNDROME, TYPE II                                          | <i>COL11A1</i> | 120280 |
| 605039 | BOHRING-OPITZ SYNDROME                                              | <i>ASXL1</i>   | 612990 |
| 605282 | TEMTAMY PREAXIAL BRACHYDACTYLY SYNDROME                             | <i>CHSY1</i>   | 608183 |
| 605289 | SPLIT-HAND/FOOT MALFORMATION 4                                      | <i>TP63</i>    | 603273 |
| 606164 | DIAMOND-BLACKFAN ANEMIA 15 WITH MANDIBULOFACIAL DYSOSTOSIS          | <i>RPS28</i>   | 603685 |
| 606170 | GENITOPATELLAR SYNDROME                                             | <i>KAT6B</i>   | 605880 |
| 606713 | VAN DER WOUDE SYNDROME 2                                            | <i>GRHL3</i>   | 608317 |
| 607313 | GAZE PALSY, FAMILIAL HORIZONTAL, WITH PROGRESSIVE SCOLIOSIS, 1      | <i>ROBO3</i>   | 608630 |
| 607330 | LATHOSTEROLOSIS                                                     | <i>SC5D</i>    | 602286 |
| 607371 | DYSTONIA, JUVENILE-ONSET                                            | <i>ACTB</i>    | 102630 |
| 607812 | CRANIOLENTICULOSUTURAL DYSPLASIA                                    | <i>SEC23A</i>  | 610511 |
| 607932 | MICROPTHALMIA, SYNDROMIC 6                                          | <i>BMP4</i>    | 112262 |

|        |                                                                                            |                 |        |
|--------|--------------------------------------------------------------------------------------------|-----------------|--------|
| 608572 | BURN-MCKEOWN SYNDROME                                                                      | <i>TXNL4A</i>   | 611595 |
| 608864 | OROFACIAL CLEFT 6, SUSCEPTIBILITY TO                                                       | <i>IRF6</i>     | 607199 |
| 608874 | OROFACIAL CLEFT 5                                                                          | <i>MSX1</i>     | 142983 |
| 609192 | LOEYS-DIETZ SYNDROME 1                                                                     | <i>TGFBP1</i>   | 190181 |
| 609460 | GOLDBERG-SHPRINTZEN SYNDROME                                                               | <i>KIAA1279</i> | 609367 |
| 609597 | PARIETAL FORAMINA 2                                                                        | <i>ALX4</i>     | 605420 |
| 609637 | HOLOPROSENCEPHALY 5                                                                        | <i>ZIC2</i>     | 603073 |
| 610125 | MICROPTHALMIA, SYNDROMIC 5                                                                 | <i>OTX2</i>     | 600037 |
| 610168 | LOEYS-DIETZ SYNDROME 2                                                                     | <i>TGFBP2</i>   | 190182 |
| 610443 | KOOLEN-DE VRIES SYNDROME                                                                   | <i>KANSL1</i>   | 612452 |
| 610536 | MANDIBULOFACIAL DYSOSTOSIS, GUION-ALMEIDA TYPE                                             | <i>EFTUD2</i>   | 603892 |
| 610628 | HYPOGONADOTROPIC HYPOGONADISM 4 WITH OR WITHOUT ANOSMIA                                    | <i>PROK2</i>    | 607002 |
| 610759 | CORNELIA DE LANGE SYNDROME 3                                                               | <i>SMC3</i>     | 606062 |
| 610828 | HOLOPROSENCEPHALY 7                                                                        | <i>PTCH1</i>    | 601309 |
| 610829 | HOLOPROSENCEPHALY 9                                                                        | <i>GLI2</i>     | 165230 |
| 611263 | SHORT-RIB THORACIC DYSPLASIA 2 WITH OR WITHOUT POLYDACTYLY                                 | <i>IFT80</i>    | 611177 |
| 611561 | MECKEL SYNDROME, TYPE 5                                                                    | <i>RPGRIP1L</i> | 610397 |
| 611881 | GLYCOGEN STORAGE DISEASE, XII                                                              | <i>ALDOA</i>    | 103850 |
| 612164 | EPILEPTIC ENCEPHALOPATHY, EARLY INFANTILE, 4; EIEE4                                        | <i>STXBP1</i>   | 602926 |
| 612284 | MECKEL SYNDROM, TYPE 6                                                                     | <i>CC2D2A</i>   | 612013 |
| 612290 | MICROTIA, HEARING IMPAIRMENT, AND CLEFT PALATE                                             | <i>HOXA2</i>    | 604685 |
| 612313 | GLASS SYNDROME                                                                             | <i>SATB2</i>    | 608148 |
| 612370 | HYPOGONADOTROPIC HYPOGONADISM 5 WITH OR WITHOUT ANOSMIA                                    | <i>CHD7</i>     | 608892 |
| 612527 | DIAMOND-BLACKFAN ANEMIA 4                                                                  | <i>RPS17</i>    | 180472 |
| 612541 | NEUTROPENIA, SEVERE CONGENITAL 4, AUTOSOMAL RECESSIVE                                      | <i>G6PC3</i>    | 611045 |
| 612561 | DIAMOND-BLACKFAN ANEMIA 6                                                                  | <i>RPL5</i>     | 603634 |
| 612562 | DIAMOND-BLACKFAN ANEMIA 7                                                                  | <i>RPL11</i>    | 604175 |
| 612563 | DIAMOND-BLACKFAN ANEMIA 8                                                                  | <i>RPS7</i>     | 603658 |
| 612651 | ENDOCRINE-CEREBROOSTEODYSPLASIA                                                            | <i>ICK</i>      | 612325 |
| 612702 | HYPOGONADOTROPIC HYPOGONADISM 6 WITH OR WITHOUT ANOSMIA                                    | <i>FGF8</i>     | 600483 |
| 613038 | PITUITARY HORMONE DEFICIENCY, COMBINED, 1                                                  | <i>POU1F1</i>   | 173110 |
| 613091 | SHORT-RIB THORACIC DYSPLASIA 3 WITH OR WITHOUT POLYDACTYLY                                 | <i>DYNC2H1</i>  | 603297 |
| 613150 | MUSCULAR DYSTROPHY-DYSTROGLYCANOPATHY (CONGENITAL WITH BRAIN AND EYE ANOMALIES), TYPE A, 2 | <i>POMT2</i>    | 607439 |
| 613192 | MENTAL RETARDATION, AUTOSOMAL RECESSIVE 13                                                 | <i>TRAPPC9</i>  | 611966 |
| 613309 | DIAMOND-BLACKFAN ANEMIA 10                                                                 | <i>RPS26</i>    | 603701 |
| 613451 | FRONTONASAL DYSPLASIA 2                                                                    | <i>ALX4</i>     | 605420 |
| 613456 | FRONTONASAL DYSPLASIA 3                                                                    | <i>ALX1</i>     | 601527 |
| 613705 | OROFACIAL CLEFT 10                                                                         | <i>SUMO1</i>    | 601912 |
| 613717 | TREACHER COLLINS SYNDROME 2                                                                | <i>POLR1D</i>   | 613715 |
| 613805 | MEIER-GORLIN SYNDROME 5                                                                    | <i>CDC6</i>     | 602627 |
| 613819 | SHORT-RIB THORACIC DYSPLASIA 4 WITH OR WITHOUT POLYDACTYLY                                 | <i>TTC21B</i>   | 612014 |

|        |                                                                                                             |                |        |
|--------|-------------------------------------------------------------------------------------------------------------|----------------|--------|
| 613885 | MECKEL SYNDROME, TYPE 8                                                                                     | <i>TCTN2</i>   | 613846 |
| 614069 | IMMUNODEFICIENCY-CENTROMERIC INSTABILITY-FACIAL ANOMALIES SYNDROME 2                                        | <i>ZBTB24</i>  | 614064 |
| 614078 | CHONDRODYSPLASIA WITH JOINT DISLOCATIONS, GPAPP TYPE                                                        | <i>IMPAD1</i>  | 614010 |
| 614091 | SHORT-RIB THORACIC DYSPLASIA 7 WITH OR WITHOUT POLYDACTYLY                                                  | <i>WDR35</i>   | 613602 |
| 614120 | HYDROLETHALUS SYNDROME 2                                                                                    | <i>KIF7</i>    | 611254 |
| 614207 | HYPERPHOSPHATASIA WITH MENTAL RETARDATION SYNDROME 3                                                        | <i>PGAP2</i>   | 615187 |
| 614226 | HOLOPROSENCEPHALY 11                                                                                        | <i>CDON</i>    | 608707 |
| 614261 | MICROCEPHALY-CAPILLARY MALFORMATION SYNDROME; MICCAP                                                        | <i>STAMPBP</i> | 606247 |
| 614376 | SHORT-RIB THORACIC DYSPLASIA 5 WITH OR WITHOUT POLYDACTYLY                                                  | <i>WDR19</i>   | 608151 |
| 614399 | MYOPATHY, AREFLEXIA, RESPIRATORY DISTRESS, AND DYSPHAGIA, EARLY-ONSET                                       | <i>MEGF10</i>  | 612453 |
| 614402 | MICROPTHALMIA, SYNDROMIC 11                                                                                 | <i>VAX1</i>    | 604294 |
| 614583 | BARAITSER-WINTER SYNDROME 2                                                                                 | <i>ACTG1</i>   | 102560 |
| 614669 | AURICULOCONDYLAR SYNDROME 2                                                                                 | <i>PLCB4</i>   | 600810 |
| 614732 | INTRAUTERINE GROWTH RETARDATION, METAPHYSEAL DYSPLASIA, ADRENAL HYPOPLASIA CONGENITA, AND GENITAL ANOMALIES | <i>CDKN1C</i>  | 600856 |
| 614838 | HYPOGONADOTROPIC HYPOGONADISM 9 WITH OR WITHOUT ANOSMIA                                                     | <i>NSMF</i>    | 608137 |
| 614880 | HYPOGONADOTROPIC HYPOGONADISM 15 WITH OR WITHOUT ANOSMIA                                                    | <i>HS6ST1</i>  | 605846 |
| 614900 | DIAMOND-BLACKFAN ANEMIA 11                                                                                  | <i>RPL26</i>   | 603704 |
| 614921 | CONGENITAL DISORDER OF GLYCOSYLATION, TYPE It                                                               | <i>PGM1</i>    | 171900 |
| 614924 | COMBINED OXIDATIVE PHOSPHORYLATION DEFICIENCY 12                                                            | <i>EARS2</i>   | 612799 |
| 614974 | FOCAL FACIAL DERMAL DYSPLASIA 4                                                                             | <i>CYP26C1</i> | 608428 |
| 615270 | HYPOGONADOTROPIC HYPOGONADISM 20 WITH OR WITHOUT ANOSMIA                                                    | <i>FGF17</i>   | 603725 |
| 615271 | HYPOGONADOTROPIC HYPOGONADISM 21 WITH OR WITHOUT ANOSMIA                                                    | <i>FLRT3</i>   | 604808 |
| 615502 | MENTAL RETARDATION, AUTOSOMAL DOMINANT 21                                                                   | <i>CTCF</i>    | 604167 |
| 615503 | SHORT-RIB THORACIC DYSPLASIA 8 WITH OR WITHOUT POLYDACTYLY                                                  | <i>WDR60</i>   | 516462 |
| 615524 | MICROPTHALMIA, SYNDROMIC 12                                                                                 | <i>RARB</i>    | 180220 |
| 615582 | LOEYS-DIETZ SYNDROME 5                                                                                      | <i>TGFB3</i>   | 190230 |
| 615630 | SHORT-RIB THORACIC DYSPLASIA 10 WITH OR WITHOUT POLYDACTYLY                                                 | <i>IFT172</i>  | 607386 |
| 615633 | SHORT-RIB THORACIC DYSPLASIA 11 WITH OR WITHOUT POLYDACTYLY                                                 | <i>WDR34</i>   | 613363 |
| 615824 | MITOCHONDRIAL COMPLEX III DEFICIENCY, NUCLEAR TYPE 7                                                        | <i>RPS7</i>    | 603658 |
| 615948 | OROFACIODIGITAL SYNDROME XIV                                                                                | <i>C2CD3</i>   | 615944 |
| 616030 | HYPOGONADOTROPIC HYPOGONADISM 22 WITH OR WITHOUT ANOSMIA                                                    | <i>FEZF1</i>   | 613301 |
| 616038 | NEU-LAXOVA SYNDROME 2                                                                                       | <i>PSAT1</i>   | 610936 |
| 616145 | CATEL-MANZKE SYNDROME                                                                                       | <i>TGDS</i>    | 616146 |
| 616268 | MENTAL RETARDATION, AUTOSOMAL DOMINANT 32                                                                   | <i>KAT6A</i>   | 601408 |
| 616331 | ROBINOW SYNDROME, AUTOSOMAL DOMINANT 2                                                                      | <i>DVL1</i>    | 601365 |



|        |                                                                                    |                 |         |
|--------|------------------------------------------------------------------------------------|-----------------|---------|
| 616367 | MANDIBULOFACIAL DYSTOSIS WITH ALOPECIA                                             | <i>EDNRA</i>    | 131243  |
| 616449 | BASEL-VANAGAITE-SMIRIN-YOSEF SYNDROME                                              | <i>MED25</i>    | 610197  |
| 616462 | ACROFACIAL DYSOSTOSIS, CINCINNATI TYPE                                             | <i>POLR1A</i>   | 616404  |
| 616546 | SHORT-RIB THORACIC DYSPLASIA 14 WITH POLYDACTYLY                                   | <i>KIAA0196</i> | 610657  |
| 616570 | CEREBROOCULOFACIOSKELETAL SYNDROME 3                                               | <i>ERCC5</i>    | 1333530 |
| 616728 | CLEFT PALATE, PSYCHOMOTOR RETARDATION, AND DISTINCTIVE FACIAL FEATURES             | <i>KDM1A</i>    | 609132  |
| 616734 | SKIN CREASES, CONGENITAL SYMMETRIC CIRCUMFERENTIAL 2                               | <i>MAPRE2</i>   | 605789  |
| 616784 | JOUBERT SYNDROME 26                                                                | <i>KIAA0556</i> | 616650  |
| 616788 | OROFACIAL CLEFT 15                                                                 | <i>DLX4</i>     | 601911  |
| 616789 | MENTAL RETARDATION AND DISTINCTIVE FACIAL FEATURES WITH OR WITHOUT CARDIAC DEFECTS | <i>MED13L</i>   | 608771  |
| 616835 | MEIER-GORLIN SYNDROME 6                                                            | <i>GMNN</i>     | 602842  |
| 616920 | HEART AND BRAIN MALFORMATION SYNDROME                                              | <i>SMG9</i>     | 613176  |
| 616897 | OSTEOCHONDRODYSPLASIA, COMPLEX LETHAL, SYMOENS-BARNES-GISTELINCK TYPE              | <i>TAPT1</i>    | 612758  |
| 617667 | FRASER SYNDROME 3                                                                  | <i>GRIP1</i>    | 604597  |
