# Supplementary material for: Transcriptome analysis of Xenopus orofacial tissues deficient in retinoic acid receptor function
Source: PubMed Central journal article supplement (PMC6215681; doi:10.1186/s12864-018-5186-8), 2018-11-03
Supplement: 12864_2018_5186_MOESM4_ESM.pdf [file 12864_2018_5186_MOESM4_ESM.pdf]

A.

| <b>Gene</b>      | <b>Full Name</b>                                      | <b>Fold Change</b> |
|------------------|-------------------------------------------------------|--------------------|
| <b>DECREASED</b> |                                                       |                    |
| <i>ABCC5</i>     | ATP Binding Cassette Subfamily C Member 5             | -2.179             |
| <i>ACSBG2</i>    | Acyl-Coa Synthetase Bubblegum Family Member 2         | -1.775             |
| <i>ACSL3</i>     | Acyl-Coa Synthetase Long Chain Family Member 3        | -2.113             |
| <i>AFDN</i>      | Afadin, Adherens Junction Formation Factor            | -1.852             |
| <i>ANKMY2</i>    | Ankyrin Repeat And MYND Domain Containing 2           | -2.160             |
| <i>ANKRD11</i>   | Ankyrin Repeat Domain 11                              | -1.867             |
| <i>ANKRD12</i>   | Ankyrin Repeat Domain 12                              | -1.920             |
| <i>AP5M1</i>     | Adaptor Related Protein Complex 5 Mu 1 Subunit        | -1.755             |
| <i>ATF7IP</i>    | Activating Transcription Factor 7 Interacting Protein | -2.203             |
| <i>ATL3</i>      | Atlastin GTPase 3                                     | -1.789             |
| <i>ATRX</i>      | ATRX, Chromatin Remodeler                             | -1.977             |
| <i>ATXN7L3</i>   | Ataxin 7 Like 3                                       | -1.792             |
|                  |                                                       | -2.009             |
|                  |                                                       | -2.037             |
| <i>BAK1</i>      | BCL2 Antagonist/Killer 1                              | -1.950             |
| <i>BARD1</i>     | BRCA1 Associated RING Domain 1                        | -2.029             |
| <i>BBX</i>       | BBX, HMG-Box Containing                               | -1.787             |
|                  |                                                       | -2.011             |
| <i>CAMK2G</i>    | Calcium/Calmodulin Dependent Protein Kinase II Gamma  | -1.773             |
|                  |                                                       | -1.855             |
|                  |                                                       | -1.891             |
|                  |                                                       | -1.901             |
|                  |                                                       | -2.102             |
|                  |                                                       | -2.123             |
|                  |                                                       | -2.174             |
|                  |                                                       | -2.185             |
| -2.202           |                                                       |                    |
| -2.596           |                                                       |                    |
| <i>CAPN8</i>     | Calpain 8                                             | -2.035             |
| <i>CCDC71L</i>   | Coiled-Coil Domain Containing 71 Like                 | -1.947             |
| <i>CDC42EP4</i>  | CDC42 Effector Protein 4                              | -1.881             |
| <i>CDH20</i>     | Cadherin 20                                           | -1.951             |
| <i>CETN1</i>     | Centrin 1                                             | -2.039             |
| <i>CHD1</i>      | Chromodomain Helicase DNA Binding Protein 1           | -2.135             |
|                  |                                                       | -2.210             |
| <i>CHD2</i>      | Chromodomain Helicase DNA Biding Protein 2            | -1.899             |
| <i>CHFR</i>      | Checkpoint With Forkhead And Ring Finger Domains      | -1.792             |
| <i>CIR1</i>      | Corepressor Interacting With RBPJ, 1                  | -2.196             |
| <i>CKAP2</i>     | Cytoskeleton Associated Protein 2                     | -2.615             |
| <i>CNOT6</i>     | CCR4-NOT Transcription Complex Subunit 6              | -1.768             |
| <i>CRYBG1</i>    | Crystallin Beta-Gamma Domain Containing 1             | -1.755             |
| <i>DAAM1</i>     | Dishevelled Associated Activator Of Morphogenesis 1   | -1.779             |
| <i>DAZAP2</i>    | DAZ Associated Protein 2                              | -1.754             |
| <i>DDX10</i>     | DEAD-Box Helicase 10                                  | -1.858             |
| <i>DHX16</i>     | DEAH-Box Helicase 16                                  | -2.159             |
| <i>DNAJB2</i>    | DNAJ Heat Shock Protein Family (Hsp40) Member B2      | -1.944             |
| <i>DNAJB9</i>    | DNAJ Heat Shock Protein Family (Hsp40) Member B9      | -2.470             |
| <i>EDN1</i>      | Endothelin 1                                          | -1.851             |
| <i>EFNB2</i>     | Ephrin B2                                             | -2.326             |
| <i>EIF3A</i>     | Eukaryotic Translation Initiation Factor 3 Subunit A  | -1.939             |

|                 |                                                                  |                  |
|-----------------|------------------------------------------------------------------|------------------|
|                 |                                                                  | -2.139<br>-2.293 |
| <i>EIF4E3</i>   | Eukaryotic Translation Initiation Factor 4E Family Member 3      | -1.777           |
| <i>EIF5B</i>    | Eukaryotic Translation Initiation Factor 5B                      | -1.975           |
| <i>ELOA</i>     | Elongin A                                                        | -1.796           |
| <i>ESCO1</i>    | Establishment Of Sister Chromatid Cohesion N-Acetyltransferase 1 | -1.947           |
| <i>ESPL1</i>    | Extra Spindle Pole Bodies Like 1, Separase                       | -1.818           |
| <i>EZH2</i>     | Enhancer Of Zeste 2 Polycomb Repressive Complex 2 Subunit        | -1.771           |
| <i>FAF2</i>     | Fas Associated Factor Family Member 2                            | -1.862           |
| <i>GCLC</i>     | Glutamate-Cysteine Ligase Catalytic Subunit                      | -1.863           |
|                 |                                                                  | -1.931           |
|                 |                                                                  | -1.942           |
|                 |                                                                  | -2.025           |
| <i>GOLGA4</i>   | Golgin A4                                                        | -1.948           |
| <i>HDAC1</i>    | Histone Deacetylase 1                                            | -1.788           |
| <i>HIC2</i>     | HIC ZBTB Transcriptional Repressor 2                             | -2.087           |
| <i>HMBOX1</i>   | Homeobox Containing 1                                            | -1.939           |
| <i>HSPH1</i>    | Heat Shock Protein Family H (Hsp110) Member 1                    | -1.841           |
| <i>IGHV4-31</i> | Immunoglobulin Heavy Variable 4-31                               | -1.896           |
| <i>ILF3</i>     | Interleukin Enhancer Binding Factor 3                            | -1.830           |
| <i>KIF21A</i>   | Kinesin Family Member 21A                                        | -1.971           |
| <i>KLF6</i>     | Kruppel Like Factor 6                                            | -1.960           |
| <i>KNOP1</i>    | Lysine Rich Nucleolar Protein 1                                  | -1.801           |
| <i>KTN1</i>     | Kinectin 1                                                       | -2.010           |
| <i>LARP7</i>    | La Ribonucleoprotein Domain Family Member 7                      | -2.308           |
| <i>LETM2</i>    | Leucine Zipper And EF-Hand Containing Transmembrane Protein 2    | -1.915           |
| <i>LHX8</i>     | LIM Homeobox 8                                                   | -2.027           |
|                 |                                                                  | -2.188           |
| <i>LIN28B</i>   | Lin-28 Homolog B                                                 | -1.902           |
| <i>LMNB1</i>    | Lamin B1                                                         | -1.913           |
| <i>LUC7L3</i>   | LUC7 Like 3 Pre-Mrna Splicing Factor                             | -2.610           |
| <i>MAP1LC3A</i> | Microtubule Associated Protein 1 Light Chain 3 Alpha             | -2.133           |
| <i>MCPH1</i>    | Microcephalin 1                                                  | -2.206           |
| <i>METAP1</i>   | Methionyl Aminopeptidase 1                                       | -1.778           |
| <i>MPHOSPH8</i> | M-Phase Phosphoprotein 8                                         | -1.755           |
|                 |                                                                  | -1.786           |
|                 |                                                                  | -1.906           |
|                 |                                                                  | -1.921           |
| <i>MTIF3</i>    | Mitochondrial Translational Initiation Factor 3                  | -1.753           |
| <i>MYO6</i>     | Myosin VI                                                        | -1.869           |
| <i>NAA25</i>    | N(Alpha)-Acetyltransferase 25, Natb Auxiliary Subunit            | -1.929           |
| <i>NCL</i>      | Nucleolin                                                        | -2.277           |
|                 |                                                                  | -2.625           |
| <i>NOP14</i>    | NOP14 Nucleolar Protein                                          | -2.018           |
| <i>NRARP</i>    | NOTCH Regulated Ankyrin Repeat Protein                           | -2.057           |
| <i>NRG1</i>     | Neuregulin 1                                                     | -2.185           |
| <i>NSRP1</i>    | Nuclear Speckle Splicing Regulatory Protein 1                    | -2.176           |
| <i>ORAI2</i>    | ORAI Calcium Release-Activated Calcium Modulator 2               | -1.882           |
| <i>OS9</i>      | OS9, Endoplasmic Reticulum Lectin                                | -1.812           |
| <i>OTOG</i>     | Otogelin                                                         | -2.032           |
| <i>PHF20</i>    | PHD Finger Protein 20                                            | -1.877           |
| <i>PLA2G4A</i>  | Phospholipase A2 Group IVA                                       | -1.899           |
| <i>PPIG</i>     | Peptidylprolyl Isomerase G                                       | -1.790           |

|                 |                                                                                                                 |                            |
|-----------------|-----------------------------------------------------------------------------------------------------------------|----------------------------|
| <i>PPP3CA</i>   | Protein Phosphatase 3 Catalytic Subunit Alpha                                                                   | -2.035<br>-2.053           |
| <i>PRDM2</i>    | PR/SET Domain 2                                                                                                 | -1.812                     |
| <i>PRPF4B</i>   | Pre-mRNA Processing Factor 4B                                                                                   | -1.934                     |
| <i>PRR12</i>    | Proline Rich 12                                                                                                 | -2.103<br>-2.111           |
| <i>PSAT1</i>    | Phosphoserine Aminotransferase 1                                                                                | -2.453                     |
| <i>RAB27A</i>   | RAB27A, Member RAS Oncogene Family                                                                              | -2.071                     |
| <i>RABEP1</i>   | Rabaptin, RAB Gtpase Binding Effector Protein 1                                                                 | -1.866<br>-2.323           |
| <i>RAD23B</i>   | RAD23 Homolog B, Nucleotide Excision Repair Protein                                                             | -1.935                     |
| <i>RBM25</i>    | RNA Binding Motif Protein 25                                                                                    | -2.220                     |
| <i>RBM28</i>    | RNA Binding Motif Protein 28                                                                                    | -1.781                     |
| <i>RDX</i>      | Radixin                                                                                                         | -1.934                     |
| <i>REST</i>     | RE1 Silencing Transcription Factor                                                                              | -1.795                     |
| <i>RFK</i>      | Riboflavin Kinase                                                                                               | -1.829                     |
| <i>RNF220</i>   | Ring Finger Protein 220                                                                                         | -1.929                     |
| <i>RNF40</i>    | Ring Finger Protein 40                                                                                          | -1.903                     |
| <i>RSF1</i>     | Remodeling And Spacing Factor 1                                                                                 | -1.838<br>-2.099<br>-1.944 |
| <i>RTF1</i>     | RTF1 Homolog, Paf1/RNA Polymerase II Complex Component                                                          | -2.017                     |
| <i>SEMA4B</i>   | Semaphorin 4B                                                                                                   | -2.087                     |
| <i>SLC7A6OS</i> | Solute Carrier Family 7 Member 6 Opposite Strand                                                                | -1.840                     |
| <i>SMARCD1</i>  | SWI/SNF-Related, Matrix-Associated Actin-Dependent Regulator Of Chromatin, Subfamily A, Containing DEAD/H Box 1 | -1.854                     |
| <i>SMUG1</i>    | Single-Strand-Selective Monofunctional Uracil-DNA Glycosylase 1                                                 | -1.949                     |
| <i>SNX2</i>     | Sorting Nexin 2                                                                                                 | -1.937                     |
| <i>SP3</i>      | Sp3 Transcription Factor                                                                                        | -1.871                     |
| <i>SPECC1</i>   | Sperm Antigen With Calponin Homology And Coiled-Coil Domains 1                                                  | -2.042                     |
| <i>SPTBN2</i>   | Spectrin Beta, Non-Erythrocytic 2                                                                               | -2.118                     |
| <i>SRPK2</i>    | SRSF Protein Kinase 2                                                                                           | -1.895<br>-1.979           |
| <i>STK3</i>     | Serine/Threonine Kinase 3                                                                                       | -1.813                     |
| <i>STRIP1</i>   | Striatin Interacting Protein 1                                                                                  | -1.797                     |
| <i>SUN1</i>     | Sad1 And UNC84 Domain Containing 1                                                                              | -1.836                     |
| <i>SUPT6H</i>   | SPT6 Homolog, Histone Chaperone                                                                                 | -2.116<br>-2.147           |
| <i>SYNCRIP</i>  | Synaptotagmin Binding Cytoplasmic RNA Interacting Protein                                                       | -1.789                     |
| <i>TBCCD1</i>   | TBCC Domain Containing 1                                                                                        | -1.769                     |
| <i>THOC2</i>    | THO Complex 2                                                                                                   | -1.779<br>-1.799           |
| <i>TRAPPC2</i>  | Trafficking Protein Particle Complex 2                                                                          | -1.775                     |
| <i>TRIM29</i>   | Tripartite Motif Containing 29                                                                                  | -2.354                     |
| <i>TRIT1</i>    | tRNA Isopentenyltransferase 1                                                                                   | -2.084                     |
| <i>TRMT10C</i>  | tRNA Methyltransferase 10C, Mitochondrial Rnase P Subunit                                                       | -2.079<br>-1.957           |
| <i>UBP1</i>     | Upstream Binding Protein 1                                                                                      | -1.900                     |
| <i>UFL1</i>     | UFM1 Specific Ligase 1                                                                                          | -2.037                     |
| <i>UHRF1</i>    | Ubiquitin Like With PHD And Ring Finger Domains 1                                                               | -2.005                     |
| <i>USO1</i>     | USO1 Vesicle Transport Factor                                                                                   | -2.294                     |
| <i>USP36</i>    | Ubiquitin Specific Peptidase 36                                                                                 | -1.913                     |

|                  |                                                                  |                         |
|------------------|------------------------------------------------------------------|-------------------------|
| <i>VCAN</i>      | Versican                                                         | -1.781                  |
| <i>XPO1</i>      | Exportin 1                                                       | -2.202                  |
| <i>XRN2</i>      | 5'-3' Exoribonuclease 2                                          | -1.756                  |
| <i>ZDHHC1</i>    | Zinc Finger DHHC-Type Containing 1                               | -1.851                  |
| <i>ZFP106</i>    | Zinc Finger Protein 106                                          | -1.816                  |
| <i>ZNF292</i>    | Zinc Finger Protein 292                                          | -1.823                  |
| <i>ZNF462</i>    | Zinc Finger Protein 462                                          | -1.912                  |
| <i>ZNF516</i>    | Zinc Finger Protein 516                                          | -1.868                  |
| <b>INCREASED</b> |                                                                  |                         |
| <i>ACCS</i>      | 1-Aminocyclopropane-1-Carboxylate Synthase Homolog               | 1.835                   |
| <i>ACIN1</i>     | Apoptotic Chromatin Condensation Inducer 1                       | 2.397<br>1.793<br>1.777 |
| <i>ACVR1B</i>    | Activin A Receptor Type 1b                                       | 1.867                   |
| <i>ADAM9</i>     | ADAM Metallopeptidase Domain 9                                   | 1.764                   |
| <i>AK1</i>       | Adenylate Kinase 1                                               | 2.412<br>1.763          |
| <i>ALAD</i>      | Aminolevulinatase Dehydratase                                    | 2.125                   |
| <i>ALDH3B1</i>   | Aldehyde Dehydrogenase 3 Family Member B1                        | 1.911                   |
| <i>ALDOA</i>     | Aldolase, Fructose-Bisphosphate A                                | 2.009                   |
| <i>ALDOB</i>     | Aldolase, Fructose-Bisphosphate B                                | 2.383<br>1.836          |
| <i>AMOTL1</i>    | Angiomotin Like 1                                                | 1.910                   |
| <i>ANGPTL7</i>   | Angiopoietin Like 7                                              | 5.013<br>2.043          |
| <i>AP1S1</i>     | Adaptor Related Protein Complex 1 Sigma 1 Subunit                | 1.789                   |
| <i>APOBEC2</i>   | Apolipoprotein B mRNA Editing Enzyme Catalytic Subunit 2         | 2.229                   |
| <i>APOH</i>      | Apolipoprotein H                                                 | 2.544                   |
| <i>APOM</i>      | Apolipoprotein M                                                 | 1.944                   |
| <i>ARHGEF19</i>  | Rho Guanine Nucleotide Exchange Factor 19                        | 1.925                   |
| <i>ARID3A</i>    | AT-Rich Interaction Domain 3A                                    | 2.411<br>1.986<br>1.800 |
| <i>ARIH2</i>     | Ariadne RBR E3 Ubiquitin Protein Ligase 2                        | 1.956                   |
| <i>ARRDC1</i>    | Arrestin Domain Containing 1                                     | 2.308                   |
| <i>ATP6AP1</i>   | ATPase H+ Transporting Accessory Protein 1                       | 1.796                   |
| <i>ATP6V0D2</i>  | ATPase H+ Transporting V0 Subunit D2                             | 1.852                   |
| <i>ATP6V1B1</i>  | ATPase H+ Transporting V1 Subunit B1                             | 2.086                   |
| <i>ATP6V1G3</i>  | ATPase H+ Transporting V1 Subunit G3                             | 1.949                   |
| <i>ATXN2</i>     | Ataxin 2                                                         | 2.280                   |
| <i>BAG6</i>      | BCL2 Associated Athanogene 6                                     | 1.783                   |
| <i>BCL9</i>      | B Cell CLL/Lymphoma 9                                            | 2.405<br>1.812          |
| <i>BHLHE40</i>   | Basic Helix-Loop-Helix Family Member E40                         | 2.154                   |
| <i>BICRA</i>     | BRD4 interacting chromatin remodeling complex associated protein | 1.870                   |
| <i>BIN1</i>      | Bridging Integrator 1                                            | 1.991<br>1.942          |
| <i>BMP2</i>      | Bone Morphogenetic Protein 2                                     | 2.232<br>2.220          |
| <i>BRD4</i>      | Bromodomain Containing 4                                         | 1.997                   |
| <i>C2ORF76</i>   | Chromosome 2 Open Reading Frame 76                               | 1.766                   |
| <i>C7</i>        | Complement C7                                                    | 1.763                   |
| <i>C8B</i>       | Complement C8 Beta Chain                                         | 1.868                   |
| <i>CA12</i>      | Carbonic Anhydrase 12                                            | 2.136                   |

|                |                                                             |                         |
|----------------|-------------------------------------------------------------|-------------------------|
| <i>CACNA1S</i> | Calcium Voltage-Gated Channel Subunit Alpha1 S              | 2.160                   |
| <i>CACNB1</i>  | Calcium Voltage-Gated Channel Auxiliary Subunit Beta 1      | 2.293<br>1.870          |
| <i>CAPNS1</i>  | Calpain Small Subunit 1                                     | 2.546                   |
| <i>CAPRN1</i>  | Cell Cycle Associated Protein 1                             | 1.991<br>1.814          |
| <i>CASQ1</i>   | Calsequestrin 1                                             | 1.846                   |
| <i>CAV2</i>    | Caveolin 2                                                  | 2.093<br>1.947          |
| <i>CAVIN1</i>  | Caveolae Associated Protein 1                               | 1.921                   |
| <i>CCNF</i>    | Cyclin F                                                    | 2.216                   |
| <i>CD44</i>    | CD44 Molecule (Indian Blood Group)                          | 2.129                   |
| <i>CDIP1</i>   | Cell Death Inducing P53 Target 1                            | 1.783                   |
| <i>CDX2</i>    | Caudal Type Homeobox 2                                      | 2.467                   |
| <i>CEBPA</i>   | CCAAT/Enhancer Binding Protein Alpha                        | 2.189                   |
| <i>CEBPD</i>   | CCAAT/Enhancer Binding Protein Delta                        | 1.918                   |
| <i>CHRNA1</i>  | Cholinergic Receptor Nicotinic Alpha 1 Subunit              | 1.980                   |
| <i>CHRND</i>   | Cholinergic Receptor Nicotinic Delta Subunit                | 1.785                   |
| <i>CHRNG</i>   | Cholinergic Receptor Nicotinic Gamma Subunit                | 2.348                   |
| <i>CKMT1B</i>  | Creatine Kinase, Mitochondrial 1B                           | 2.004                   |
| <i>CNOT4</i>   | CCR4-NOT Transcription Complex Subunit 4                    | 2.005                   |
| <i>COBL</i>    | Cordon-Bleu WH2 Repeat Protein                              | 2.160                   |
| <i>COL11A1</i> | Collagen Type XI Alpha 1 Chain                              | 1.956                   |
| <i>COL1A1</i>  | Collagen Type I Alpha 1 Chain                               | 2.206<br>1.999          |
| <i>COL1A2</i>  | Collagen Type I Alpha 2 Chain                               | 1.776                   |
| <i>COL28A1</i> | Collagen Type XXVIII Alpha 1 Chain                          | 1.984                   |
| <i>COL2A1</i>  | Collagen Type II Alpha 1 Chain                              | 2.239                   |
| <i>COL5A1</i>  | Collagen Type V Alpha 1 Chain                               | 2.211                   |
| <i>COL9A1</i>  | Collagen Type IX Alpha 1 Chain                              | 2.468<br>2.329          |
| <i>COL9A2</i>  | Collagen Type IX Alpha 2 Chain                              | 1.769                   |
| <i>COL9A3</i>  | Collagen Type IX Alpha 3 Chain                              | 1.750                   |
| <i>CPSF1</i>   | Cleavage And Polyadenylation Specific Factor 1              | 2.009                   |
| <i>CRABP2</i>  | Cellular Retinoic Acid Binding Protein 2                    | 1.824                   |
| <i>CRP</i>     | C-Reactive Protein                                          | 2.050                   |
| <i>CSNK2A1</i> | Casein Kinase 2 Alpha 1                                     | 2.583<br>2.009<br>1.988 |
| <i>CTR9</i>    | CTR9 Homolog, Paf1/RNA Polymerase II Complex Component      | 1.769                   |
| <i>DBN1</i>    | Drebrin 1                                                   | 2.027                   |
| <i>DBNL</i>    | Drebrin Like                                                | 1.792                   |
| <i>DDT</i>     | D-Dopachrome Tautomerase                                    | 2.075                   |
| <i>DGKA</i>    | Diacylglycerol Kinase Alpha                                 | 1.792                   |
| <i>DHRS3</i>   | Dehydrogenase/Reductase 3                                   | 2.533                   |
| <i>DNAJC5</i>  | Dnaj Heat Shock Protein Family (Hsp40) Member C5            | 1.945                   |
| <i>DOK1</i>    | Docking Protein 1                                           | 2.037                   |
| <i>EFNA1</i>   | Ephrin A1                                                   | 2.266                   |
| <i>EFNB1</i>   | Ephrin B1                                                   | 1.919                   |
| <i>EIF4E3</i>  | Eukaryotic Translation Initiation Factor 4E Family Member 3 | 2.149                   |
| <i>ELOB</i>    | Elongin B                                                   | 2.582<br>2.506          |
| <i>ENO3</i>    | Enolase 3                                                   | 2.316                   |
| <i>ENTPD2</i>  | Ectonucleoside Triphosphate Diphosphohydrolase 2            | 1.883                   |
| <i>F11R</i>    | F11 Receptor                                                | 1.771                   |

|                 |                                                        |                |
|-----------------|--------------------------------------------------------|----------------|
| <i>F2</i>       | Coagulation Factor II, Thrombin                        | 1.805          |
| <i>FAM32A</i>   | Family With Sequence Similarity 32 Member A            | 1.938          |
| <i>FBLIM1</i>   | Filamin Binding LIM Protein 1                          | 1.988          |
| <i>FBXL22</i>   | F-box and leucine rich repeat protein 22               | 1.766          |
| <i>FETUB</i>    | Fetuin B                                               | 2.179          |
| <i>FGA</i>      | Fibrinogen Alpha Chain                                 | 2.245          |
| <i>FLNC</i>     | Filamin C                                              | 1.969          |
| <i>FOS</i>      | Fos Proto-Oncogene, AP-1 Transcription Factor Subunit  | 1.789          |
| <i>FOXD1</i>    | Forkhead Box D1                                        | 2.488          |
| <i>FSTL1</i>    | Follistatin Like 1                                     | 1.864          |
| <i>G6PC</i>     | Glucose 6-Phosphatases, Catalytic                      | 2.296          |
| <i>GAMT</i>     | Guanidinoacetate N-Methyltransferase                   | 2.055<br>1.987 |
| <i>GATA2</i>    | GATA Binding Protein 2                                 | 2.278<br>1.846 |
| <i>GATA5</i>    | GATA Binding Protein 5                                 | 2.044          |
| <i>GEMIN2</i>   | Gem Nuclear Organelle Associated Protein 2             | 1.805          |
| <i>GJA3</i>     | Gap Junction Protein Alpha 3                           | 2.408          |
| <i>GJB2</i>     | Gap Junction Protein Beta 2                            | 2.349          |
| <i>GJB6</i>     | Gap Junction Protein Beta 6                            | 1.942          |
| <i>GPN1</i>     | GPN-Loop Gtpase 1                                      | 2.204          |
| <i>GPSM1</i>    | G Protein Signaling Modulator 1                        | 1.954          |
| <i>GRAMD1C</i>  | GRAM Domain Containing 1C                              | 2.383          |
| <i>HABP2</i>    | Hyaluronan Binding Protein 2                           | 2.536          |
| <i>HAL</i>      | Histidine Ammonia-Lyase                                | 1.817          |
| <i>HCFC1</i>    | Host Cell Factor C1                                    | 2.042          |
| <i>HDLBP</i>    | High Density Lipoprotein Binding Protein               | 2.457          |
| <i>HECTD1</i>   | HECT Domain E3 Ubiquitin Protein Ligase 1              | 2.577          |
| <i>HHATL</i>    | Hedgehog Acyltransferase Like                          | 2.233          |
| <i>HIPK2</i>    | Homeodomain Interacting Protein Kinase 2               | 1.769          |
| <i>HIPK3</i>    | Homeodomain Interacting Protein Kinase 3               | 2.468          |
| <i>HNF4A</i>    | Hepatocyte Nuclear Factor 4 Alpha                      | 2.430          |
| <i>HOXA11</i>   | Homeobox A11                                           | 1.781          |
| <i>HOXA7</i>    | Homeobox A7                                            | 2.221          |
| <i>HOXB2</i>    | Homeobox B2                                            | 2.564          |
| <i>HOXB3</i>    | Homeobox B3                                            | 2.196          |
| <i>HOXB4</i>    | Homeobox B4                                            | 2.286          |
| <i>HOXB8</i>    | Homeobox B8                                            | 2.429          |
| <i>HOXC8</i>    | Homeobox C8                                            | 1.868          |
| <i>HOXD11</i>   | Homeobox D11                                           | 2.297          |
| <i>HP1BP3</i>   | Heterochromatin Protein 1 Binding Protein 3            | 2.468          |
| <i>HSPA8</i>    | Heat Shock Protein Family A (Hsp70) Member 8           | 2.311          |
| <i>HSP90AB1</i> | Heat Shock Protein 90 Alpha Family Class B Member 1    | 2.077          |
| <i>ID2</i>      | Inhibitor Of DNA Binding 2                             | 1.762          |
| <i>IGFBP1</i>   | Insulin Like Growth Factor Binding Protein 1           | 2.628          |
| <i>ILK</i>      | Integrin Linked Kinase                                 | 2.476          |
| <i>IQGAP3</i>   | IQ Motif Containing Gtpase Activating Protein 3        | 2.067          |
| <i>IRX1</i>     | Iroquois Homeobox 1                                    | 1.757          |
| <i>IRX3</i>     | Iroquois Homeobox 3                                    | 2.028          |
| <i>ITGA7</i>    | Integrin Subunit Alpha 7                               | 1.797          |
| <i>JUNB</i>     | Junb Proto-Oncogene, AP-1 Transcription Factor Subunit | 1.798          |
| <i>KLHL41</i>   | Kelch Like Family Member 41                            | 2.226          |
| <i>KDM5C</i>    | Lysine Demethylase 5C                                  | 2.295          |
| <i>KHSRP</i>    | KH-Type Splicing Regulatory Protein                    | 1.757          |

|                |                                                  |                |
|----------------|--------------------------------------------------|----------------|
| <i>KLC1</i>    | Kinesin Light Chain 1                            | 1.956          |
| <i>KLF2</i>    | Kruppel Like Factor 2                            | 1.884          |
| <i>KLK10</i>   | Kallikrein Related Peptidase 10                  | 1.803          |
| <i>KRT16</i>   | Keratin 16                                       | 2.362          |
| <i>LAMA2</i>   | Laminin Subunit Alpha 2                          | 2.159          |
| <i>LDHA</i>    | Lactate Dehydrogenase A                          | 2.445          |
| <i>LGALS9C</i> | Galectin 9C                                      | 2.444<br>2.431 |
| <i>LMOD3</i>   | Leiomodin 3                                      | 2.253          |
| <i>MAFB</i>    | MAF Bzip Transcription Factor B                  | 2.177<br>1.848 |
| <i>MARCH3</i>  | Membrane Associated Ring-CH-Type Finger 3        | 1.768          |
| <i>MARK2</i>   | Microtubule Affinity Regulating Kinase 2         | 1.886          |
| <i>MARK4</i>   | Microtubule Affinity Regulating Kinase 4         | 2.048          |
| <i>MAT2A</i>   | Methionine Adenosyltransferase 2A                | 2.331          |
| <i>MATN4</i>   | Matrilin 4                                       | 2.010          |
| <i>MEIS3</i>   | Meis Homeobox 3                                  | 1.797          |
| <i>MIA3</i>    | MIA Family Member 3, ER Export Factor            | 2.299          |
| <i>MOSPD3</i>  | Motile Sperm Domain Containing 3                 | 1.794          |
| <i>MPRIP</i>   | Myosin Phosphatase Rho Interacting Protein       | 1.856          |
| <i>MSGN1</i>   | Mesogenin 1                                      | 2.320          |
| <i>MTA2</i>    | Metastasis Associated 1 Family Member 2          | 2.213          |
| <i>MUC1</i>    | Mucin 1, Cell Surface Associated                 | 2.164          |
| <i>MUC2</i>    | Mucin 2, Oligomeric Mucus/Gel-Forming            | 1.943          |
| <i>MVP</i>     | Major Vault Protein                              | 1.970          |
| <i>MXI1</i>    | MAX Interactor 1, Dimerization Protein           | 1.998          |
| <i>MYF5</i>    | Myogenic Factor 5                                | 1.854          |
| <i>MYH10</i>   | Myosin Heavy Chain 10                            | 2.374          |
| <i>MYH3</i>    | Myosin Heavy Chain 3                             | 1.814          |
| <i>MYO1E</i>   | Myosin IE                                        | 2.100          |
| <i>MYOC</i>    | Myocilin                                         | 2.270          |
| <i>MYOD1</i>   | Myogenic Differentiation 1                       | 2.114          |
| <i>MYOT</i>    | Myotilin                                         | 1.863          |
| <i>MYOZ2</i>   | Myozenin 2                                       | 2.157          |
| <i>NAV2</i>    | Neuron Navigator 2                               | 2.374          |
| <i>NEFM</i>    | Neurofilament Medium                             | 1.880          |
| <i>NEXN</i>    | Nexilin F-Actin Binding Protein                  | 2.605          |
| <i>NR4A1</i>   | Nuclear Receptor Subfamily 4 Group A Member 1    | 1.983<br>1.935 |
| <i>NT5C3A</i>  | 5'-Nucleotidase, Cytosolic IIIA                  | 2.231          |
| <i>ODAM</i>    | Odontogenic, Ameloblast Associated               | 2.189          |
| <i>OGDH</i>    | Oxoglutarate Dehydrogenase                       | 2.271          |
| <i>OTUB1</i>   | OTU Deubiquitinase, Ubiquitin Aldehyde Binding 1 | 1.825          |
| <i>PAN3</i>    | PAN3 Poly(A) Specific Ribonuclease Subunit       | 1.838          |
| <i>PAX7</i>    | Paired Box 7                                     | 2.107          |
| <i>PBRM1</i>   | Polybromo 1                                      | 1.808          |
| <i>PCK1</i>    | Phosphoenolpyruvate Carboxykinase 1              | 2.415          |
| <i>PCOLCE</i>  | Procollagen C-Endopeptidase Enhancer             | 1.891          |
| <i>PCP4L1</i>  | Purkinje Cell Protein 4 Like 1                   | 1.760          |
| <i>PDLIM7</i>  | PDZ And LIM Domain 7                             | 2.406          |
| <i>PFN1</i>    | Profilin 1                                       | 1.830          |
| <i>PI4KB</i>   | Phosphatidylinositol 4-Kinase Beta               | 2.040          |
| <i>PITX1</i>   | Paired Like Homeodomain 1                        | 1.982          |
| <i>PLCL2</i>   | Phospholipase C Like 2                           | 1.910          |

|                 |                                                                     |                         |
|-----------------|---------------------------------------------------------------------|-------------------------|
| <i>PLEC</i>     | Plectin                                                             | 1.910                   |
| <i>PMM2</i>     | Phosphomannomutase 2                                                | 2.219                   |
| <i>PMPCA</i>    | Peptidase, Mitochondrial Processing Alpha Subunit                   | 2.078                   |
| <i>PNPLA7</i>   | Patatin Like Phospholipase Domain Containing 7                      | 2.329                   |
| <i>PPARG</i>    | Peroxisome Proliferator Activated Receptor Gamma                    | 2.031                   |
| <i>PPDPF</i>    | Pancreatic Progenitor Cell Differentiation And Proliferation Factor | 1.951<br>1.861<br>1.764 |
| <i>PPIP5K2</i>  | Diphosphoinositol Pentakisphosphate Kinase 2                        | 2.365                   |
| <i>PPP1R3C</i>  | Protein Phosphatase 1 Regulatory Subunit 3C                         | 1.920                   |
| <i>PPP2CA</i>   | Protein Phosphatase 2 Catalytic Subunit Alpha                       | 1.752                   |
| <i>PRKAG3</i>   | Protein Kinase AMP-Activated Non-Catalytic Subunit Gamma 3          | 2.264                   |
| <i>PRKAR1A</i>  | Protein Kinase Camp-Dependent Type I Regulatory Subunit Alpha       | 2.358                   |
| <i>PRRC2A</i>   | Proline Rich Coiled-Coil 2A                                         | 2.007                   |
| <i>PRRC2B</i>   | Proline Rich Coiled-Coil 2B                                         | 2.629<br>1.766          |
| <i>PRTN3</i>    | Proteinase 3                                                        | 2.164                   |
| <i>PTGES3L</i>  | Prostaglandin E Synthase 3 Like                                     | 1.850                   |
| <i>PTK2</i>     | Protein Tyrosine Kinase 2                                           | 1.933                   |
| <i>PTPN1</i>    | Protein Tyrosine Phosphatase, Non-Receptor Type 1                   | 2.050                   |
| <i>PUS3</i>     | Pseudouridylate Synthase 3                                          | 2.044                   |
| <i>PYGO2</i>    | Pygopus Family PHD Finger 2                                         | 2.199                   |
| <i>QTRT2</i>    | Queuine Trna-Ribosyltransferase Accessory Subunit 2                 | 2.063                   |
| <i>R3HDM2</i>   | R3H Domain Containing 2                                             | 2.254                   |
| <i>RAB10</i>    | RAB10, Member RAS Oncogene Family                                   | 2.092                   |
| <i>RAB14</i>    | RAB14, Member RAS Oncogene Family                                   | 2.454                   |
| <i>RAB1A</i>    | RAB1A, Member RAS Oncogene Family                                   | 2.078                   |
| <i>RAB2A</i>    | RAB2A, Member RAS Oncogene Family                                   | 1.868                   |
| <i>RAB40C</i>   | RAB40C, Member RAS Oncogene Family                                  | 1.954                   |
| <i>RAP1GAP</i>  | RAP1 Gtpase Activating Protein                                      | 1.827                   |
| <i>RAPSN</i>    | Receptor Associated Protein Of The Synapse                          | 1.834                   |
| <i>RBFOX3</i>   | RNA Binding Fox-1 Homolog 3                                         | 1.861                   |
| <i>RBPMS</i>    | RNA Binding Protein With Multiple Splicing                          | 1.847                   |
| <i>RBPMS2</i>   | RNA Binding Protein With Multiple Splicing 2                        | 2.039                   |
| <i>RCSD1</i>    | RCSD Domain Containing 1                                            | 1.895                   |
| <i>RDH11</i>    | Retinol Dehydrogenase 11 (All-Trans/9-Cis/11-Cis)                   | 1.939                   |
| <i>RFESD</i>    | Rieske Fe-S Domain Containing                                       | 2.189                   |
| <i>RHOG</i>     | Ras Homolog Family Member G                                         | 1.754                   |
| <i>RIPPLY3</i>  | Ripply Transcriptional Repressor 3                                  | 1.763                   |
| <i>SCN2A</i>    | Sodium Voltage-Gated Channel Alpha Subunit 2                        | 1.962                   |
| <i>SCN3A</i>    | Sodium Voltage-Gated Channel Alpha Subunit 3                        | 1.897                   |
| <i>SDS</i>      | Serine Dehydratase                                                  | 2.156                   |
| <i>SEC14L1</i>  | SEC14 Like Lipid Binding 1                                          | 1.956                   |
| <i>SELENOP</i>  | Selenoprotein P                                                     | 2.580                   |
| <i>SEN3</i>     | SUMO1/Sentrin/SMT3 Specific Peptidase 3                             | 2.224<br>2.096          |
| <i>SEPP1</i>    | Selenoprotein P                                                     | 2.580                   |
| <i>SERPIND1</i> | Serpin Family D Member 1                                            | 1.799                   |
| <i>SETDB1</i>   | SET Domain Bifurcated 1                                             | 2.121<br>2.078          |
| <i>SGCB</i>     | Sarcoglycan Beta                                                    | 2.636                   |
| <i>SH3BGR</i>   | SH3 Domain Binding Glutamate Rich Protein                           | 2.590                   |
| <i>SHC1</i>     | SHC Adaptor Protein 1                                               | 2.159                   |



|                 |                                                                   |                |
|-----------------|-------------------------------------------------------------------|----------------|
| <i>SIK1</i>     | Salt Inducible Kinase 1                                           | 2.081          |
| <i>SIX1</i>     | SIX Homeobox 1                                                    | 2.351          |
| <i>SLC16A3</i>  | Solute Carrier Family 16 Member 3                                 | 1.815          |
| <i>SLC26A6</i>  | Solute Carrier Family 26 Member 6                                 | 2.413          |
| <i>SMC3</i>     | Structural Maintenance Of Chromosomes 3                           | 2.244          |
| <i>SMURF1</i>   | SMAD Specific E3 Ubiquitin Protein Ligase 1                       | 1.824          |
| <i>SOD3</i>     | Superoxide Dismutase 3                                            | 2.046          |
| <i>SOX10</i>    | SRY-Box 10                                                        | 1.881          |
| <i>SP3</i>      | Sp3 Transcription Factor                                          | 2.582          |
| <i>SRF</i>      | Serum Response Factor                                             | 1.948          |
| <i>SSBP1</i>    | Single Stranded DNA Binding Protein 1                             | 2.156          |
| <i>STAT5A</i>   | Signal Transducer And Activator Of Transcription 5A               | 1.959          |
| <i>SYNPO2L</i>  | Synaptopodin 2 Like                                               | 2.326          |
| <i>SYPL2</i>    | Synaptophysin Like 2                                              | 2.069          |
| <i>TACR1</i>    | Tachykinin Receptor 1                                             | 2.165          |
| <i>TAL1</i>     | TAL Bhlh Transcription Factor 1, Erythroid Differentiation Factor | 2.210          |
| <i>THBS4</i>    | Thrombospondin 4                                                  | 2.598          |
| <i>THOC6</i>    | THO Complex 6                                                     | 2.413          |
| <i>TJAP1</i>    | Tight Junction Associated Protein 1                               | 1.855<br>1.751 |
| <i>TLX3</i>     | T Cell Leukemia Homeobox 3                                        | 2.583          |
| <i>TMEM163</i>  | Transmembrane Protein 163                                         | 1.757          |
| <i>TMEM72</i>   | Transmembrane Protein 72                                          | 1.785          |
| <i>TOP2B</i>    | DNA Topoisomerase II Beta                                         | 1.882          |
| <i>TRAK1</i>    | Trafficking Kinesin Protein 1                                     | 2.113<br>2.038 |
| <i>TRAPPC10</i> | Trafficking Protein Particle Complex 10                           | 2.088          |
| <i>TRAPPC9</i>  | Trafficking Protein Particle Complex 9                            | 1.821          |
| <i>TRIM55</i>   | Tripartite Motif Containing 55                                    | 2.627          |
| <i>TRIM66</i>   | Tripartite Motif Containing 66                                    | 1.763          |
| <i>TSPAN18</i>  | Tetraspanin 18                                                    | 2.170          |
| <i>TUBA8</i>    | Tubulin Alpha 8                                                   | 1.925          |
| <i>TXLNB</i>    | Taxilin Beta                                                      | 2.135          |
| <i>UBA1</i>     | Ubiquitin Like Modifier Activating Enzyme 1                       | 1.991          |
| <i>UBAP2L</i>   | Ubiquitin Associated Protein 2 Like                               | 2.037          |
| <i>UBE2R2</i>   | Ubiquitin Conjugating Enzyme E2 R2                                | 1.786          |
| <i>UBE2V1</i>   | Ubiquitin Conjugating Enzyme E2 V1                                | 1.787          |
| <i>UBQLN1</i>   | Ubiquilin 1                                                       | 2.288          |
| <i>UBQLN4</i>   | Ubiquilin 4                                                       | 2.044          |
| <i>UBR5</i>     | Ubiquitin Protein Ligase E3 Component N-Recognin 5                | 2.022          |
| <i>UCMA</i>     | Upper Zone Of Growth Plate And Cartilage Matrix Associated        | 1.756          |
| <i>UPK1B</i>    | Uroplakin 1B                                                      | 1.934          |
| <i>VAMP2</i>    | Vesicle Associated Membrane Protein 2                             | 2.585          |
| <i>LDLR</i>     | Very Low Density Lipoprotein Receptor                             | 1.799          |
| <i>WASHC1</i>   | WASH Complex Subunit 1                                            | 1.772          |
| <i>WBP2</i>     | WW Domain Binding Protein 2                                       | 1.891          |
| <i>WDR54</i>    | WD Repeat Domain 54                                               | 1.952          |
| <i>WEE1</i>     | WEE1 G2 Checkpoint Kinase                                         | 2.349          |
| <i>XIRP1</i>    | Xin Actin Binding Repeat Containing 1                             | 1.770          |
| <i>XPO1</i>     | Exportin 1                                                        | 1.953          |
| <i>ZNF652</i>   | Zinc Finger Protein 652                                           | 1.791          |
| <i>ZNF653</i>   | Zinc Finger Protein 653                                           | 1.795          |
| <i>ZNF703</i>   | Zinc Finger Protein 703                                           | 2.087          |

|     |       |                |
|-----|-------|----------------|
| ZYX | Zyxin | 2.103<br>1.891 |
|-----|-------|----------------|

B.

| <b>HGNC</b>      | <b>Gene Name</b>                                          | <b>Log<sub>2</sub><br/>Fold Change</b> |
|------------------|-----------------------------------------------------------|----------------------------------------|
| <b>DECREASED</b> |                                                           |                                        |
| <i>ADAMTS13</i>  | Adam Metallopeptidase With Thrombospondin Type 1 Motif 13 | -0.499                                 |
| <i>ADGRG2</i>    | Adhesion G Protein-Coupled Receptor G2                    | -0.573                                 |
| <i>AKAP12</i>    | A-Kinase Anchoring Protein 12                             | -0.502<br>-0.618                       |
| <i>ALDH1A2</i>   | Aldehyde Dehydrogenase 1 Family Member A2                 | -0.413<br>-0.493                       |
| <i>ALX1</i>      | Alx Homeobox 1                                            | -0.431<br>-0.586                       |
| <i>ALX4</i>      | Alx Homeobox 4                                            | -0.733<br>-0.926                       |
| <i>ATP13A4</i>   | Atpase 13A4                                               | -0.516                                 |
| <i>BGN</i>       | Biglycan                                                  | -0.675                                 |
| <i>BMP2</i>      | Bone Morphogenetic Protein 2                              | -0.456                                 |
| <i>BMP5</i>      | Bone Morphogenetic Protein 5                              | -0.696                                 |
| <i>CLEC11A</i>   | C-Type Lectin Domain Containing 11a                       | -0.625                                 |
| <i>CLU</i>       | Clusterin                                                 | -0.447                                 |
| <i>COCH</i>      | Cochlin                                                   | -0.950                                 |
| <i>COL9A1</i>    | Collagen Type IX Alpha 1 Chain                            | -0.465<br>-0.583                       |
| <i>COL9A2</i>    | Collagen Type IX Alpha 2 Chain                            | -0.345                                 |
| <i>COL9A3</i>    | Collagen Type IX Alpha 3 Chain                            | -0.374                                 |
| <i>COLEC12</i>   | Collectin Subfamily Member 12                             | -0.420<br>-0.423                       |
| <i>CORIN</i>     | Corin, Serine Peptidase                                   | -0.460                                 |
| <i>CPN1</i>      | Carboxypeptidase N Subunit 1                              | -0.537                                 |
| <i>CPXM1</i>     | Carboxypeptidase X, M14 Family Member 1                   | -0.429                                 |
| <i>CRABP2</i>    | Cellular Retinoic Acid Binding Protein 2                  | -0.485<br>-0.939                       |
| <i>CYP26A1</i>   | Cytochrome P450 Family 26 Subfamily A Member 1            | -0.690<br>-1.637                       |
| <i>CYP26B1</i>   | Cytochrome P450 Family 26 Subfamily B Member 1            | -0.697                                 |
| <i>CYP26C1</i>   | Cytochrome P450 Family 26 Subfamily C Member 1            | -0.440                                 |
| <i>DHRS3</i>     | Dehydrogenase/Reductase 3                                 | -0.734<br>-1.052                       |
| <i>DMBX1</i>     | Diencephalon/Mesencephalon Homeobox 1                     | -0.648                                 |
| <i>DNAJC12</i>   | Dnaj Heat Shock Protein Family (Hsp40) Member C12         | -0.659                                 |
| <i>EDNRB</i>     | Endothelin Receptor Type B                                | -0.474                                 |
| <i>EMILIN1</i>   | Elastin Microfibril Interfacer 1                          | -0.356                                 |
| <i>EN2</i>       | Engrailed Homeobox 2                                      | -0.618                                 |
| <i>ENTPD1</i>    | Ectonucleoside Triphosphate Diphosphohydrolase 1          | -0.497                                 |
| <i>EYA2</i>      | Eya Transcriptional Coactivator And Phosphatase 2         | -0.475                                 |
| <i>F2R</i>       | Coagulation Factor Ii Thrombin Receptor                   | -0.465                                 |
| <i>FAM151A</i>   | Family With Sequence Similarity 151 Member A              | -0.417                                 |

|                  |                                                            |                  |
|------------------|------------------------------------------------------------|------------------|
| <i>FOXC1</i>     | Forkhead Box C1                                            | -0.508           |
| <i>FOXD1</i>     | Forkhead Box D1                                            | -0.501           |
| <i>FOXI4</i>     | Forkhead Box I4                                            | -0.563           |
| <i>FOXP4</i>     | Forkhead Box P4                                            | -0.425           |
| <i>GATA2</i>     | GATA Binding Protein 2                                     | -0.587<br>-0.815 |
| <i>GATA3</i>     | GATA Binding Protein 3                                     | -0.476<br>-0.668 |
| <i>GH1</i>       | Growth Hormone 1                                           | -0.484<br>-0.660 |
| <i>GLIS3</i>     | GLIS Family Zinc Finger 3                                  | -0.536           |
| <i>HAS2</i>      | Hyaluronan Synthase 2                                      | -0.526<br>-0.710 |
| <i>HEBP2</i>     | Heme Binding Protein 2                                     | -0.485           |
| <i>HIC1</i>      | HIC ZBTB Transcriptional Repressor 1                       | -0.774           |
| <i>HMGA2</i>     | High Mobility Group AT-Hook 2                              | -0.485           |
| <i>HOXA4</i>     | Homeobox A4                                                | -0.562           |
| <i>HSPA12B</i>   | Heat Shock Protein Family A (Hsp70) Member 12B             | -0.373           |
| <i>IL11RA</i>    | Interleukin 11 Receptor Subunit Alpha                      | -0.407           |
| <i>IL13RA2</i>   | Interleukin 13 Receptor Subunit Alpha 2                    | -0.318           |
| <i>KIAA1755</i>  | KIAA1755                                                   | -0.435           |
| <i>KRT19</i>     | Keratin 19                                                 | -0.617           |
| <i>MATN4</i>     | Matrilin 4                                                 | -0.518           |
| <i>MYADM</i>     | Myeloid Associated Differentiation Marker                  | -0.467           |
| <i>MYL4</i>      | Myosin Light Chain 4                                       | -0.495           |
| <i>MYOM3</i>     | Myomesin 3                                                 | -0.394           |
| <i>NEFM</i>      | Neurofilament Medium                                       | -0.474           |
| <i>PAH</i>       | Phenylalanine Hydroxylase                                  | -0.575           |
| <i>PRRT3</i>     | Proline Rich Transmembrane Protein 3                       | -0.547           |
| <i>QDPR</i>      | Quinoid Dihydropteridine Reductase                         | -0.446           |
| <i>RARB</i>      | Retinoic Acid Receptor Beta                                | -0.731           |
| <i>RARG</i>      | Retinoic Acid Receptor Gamma                               | -0.375           |
| <i>RHBG</i>      | Rh Family B Glycoprotein (Gene/Pseudogene)                 | -0.659<br>-0.440 |
| <i>S100A9</i>    | S100 Calcium Binding Protein A9                            | -0.474           |
| <i>SEPT9</i>     | Septin 9                                                   | -0.376           |
| <i>SFRP1</i>     | Secreted Frizzled Related Protein 1                        | -0.498<br>-0.697 |
| <i>SIX2</i>      | SIX Homeobox 2                                             | -0.516<br>-0.805 |
| <i>SNCG</i>      | Synuclein Gamma                                            | -0.466           |
| <i>SSPO</i>      | SCO-Spondin                                                | -0.542           |
| <i>SSTR2</i>     | Somatostatin Receptor 2                                    | -0.717           |
| <i>TAL2</i>      | TAL Bhlh Transcription Factor 2                            | -0.542           |
| <i>TGFBI</i>     | Transforming Growth Factor Beta Induced                    | -0.709           |
| <i>TRABD2B</i>   | TRAB Domain Containing 2B                                  | -0.411           |
| <i>UCMA</i>      | Upper Zone Of Growth Plate And Cartilage Matrix Associated | -0.578           |
| <i>WNT1</i>      | Wnt Family Member 1                                        | -0.347           |
| <b>INCREASED</b> |                                                            |                  |
| <i>AIFM3</i>     | Apoptosis Inducing Factor, Mitochondria Associated 3       | 0.406            |
| <i>ATOH7</i>     | Atonal Bhlh Transcription Factor 7                         | 0.402            |
| <i>CAPN3</i>     | Calpain 3                                                  | 0.570            |
| <i>CHODL</i>     | Chondrolectin                                              | 0.538            |

|                |                                                    |                |
|----------------|----------------------------------------------------|----------------|
| <i>CLUL1</i>   | Clusterin Like 1                                   | 0.354          |
| <i>CRYBG1</i>  | Crystallin Beta-Gamma Domain Containing 1          | 0.393          |
| <i>DLX2</i>    | Distal-Less Homeobox 2                             | 0.527          |
| <i>ERMIN</i>   | Ermin                                              | 0.386          |
| <i>FRZB</i>    | Frizzled Related Protein                           | 0.598          |
| <i>HBD</i>     | Hemoglobin Subunit Delta                           | 0.590          |
| <i>HEMGN</i>   | Hemogen                                            | 0.452          |
| <i>IGFBP2</i>  | Insulin Like Growth Factor Binding Protein 2       | 0.407          |
| <i>LHX1</i>    | LIM Homeobox 1                                     | 0.414          |
| <i>PCK2</i>    | Phosphoenolpyruvate Carboxykinase 2, Mitochondrial | 0.469          |
| <i>SIM2</i>    | Single-Minded Family bHLH Transcription Factor 2   | 0.538<br>0.463 |
| <i>SLC39A8</i> | Solute Carrier Family 39 Member 8                  | 0.542          |
| <i>SMOC1</i>   | SPARC Related Modular Calcium Binding 1            | 0.541          |
| <i>VSX1</i>    | Visual System Homeobox 1                           | 0.585          |
